# Supplementary material
Source: ML conference proceedings conference paper supplement (https://openreview.net/forum?id=D21DRzkZbSB)
Supplement: supplementary_material [file attachment]

# Supplementary

## A Additional Visualization of Rooms

Please see <https://sites.google.com/view/nafs-neurips2022> for videos of loudness plots as we move an emitter.

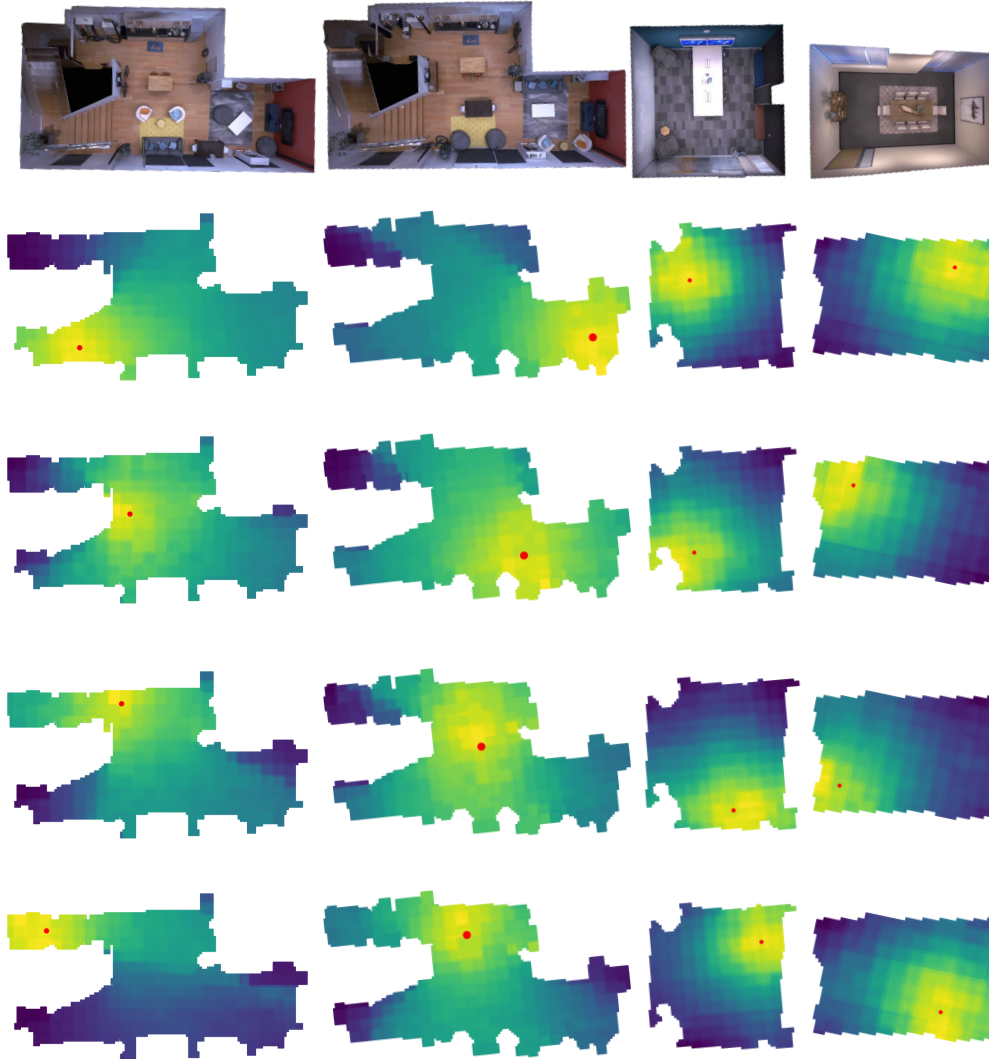

Figure A1: **Additional Qualitative Predictions of NAF.** Qualitative visualization of the loudness map as predicted by NAF across four different rooms.

We show additional NAF predictions of loudness as we move an emitter inside different rooms in Figure A1. For each room, note how the sound is affected by the geometry. In wide open spaces the sound is highly dispersed. While in thin structures the sound tends to concentrate locally. As we move farther from the source, the loudness of the sound decreases.

## 9 B Additional Visualization on Real-World Data

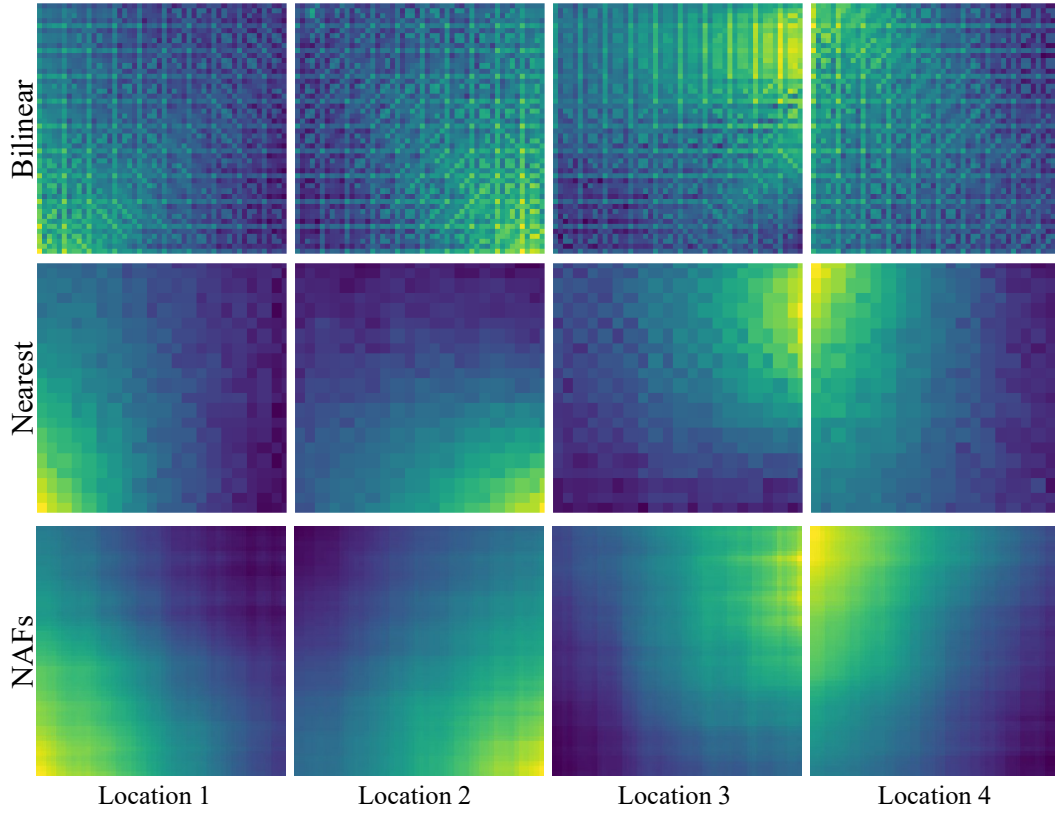

Figure A2: **Comparison on the MeshRIR real-world dataset.** We compare our method on the MeshRIR dataset across four emitter locations. **Top.** The loudness map using bilinear interpolation of the ground truth. **Middle.** The loudness map using nearest interpolation of the ground truth. **Bottom.** The loudness map predicted using NAFs. Our method can predict a smoothly varying loudness map without artifacts.

10 In Figure A2 we compare on the MeshRIR dataset which is collected from the real-world. Bilinear  
 11 interpolation introduces characteristic artifacts at the sample boundaries, while nearest neighbor has  
 12 discretization artifacts. In contrast, our NAFs are able to predict a smoothly varying acoustic field  
 13 despite learning from discretely sampled training data.

## 14 C Additional quantitative results

|                  | Spectral     | T60          | DRR          |
|------------------|--------------|--------------|--------------|
| Ridge-Orig       | 2.539        | 8.192        | 2.497        |
| Ridge-Unfiltered | 1.370        | 6.294        | 3.702        |
| NAF (Dual)       | <b>0.403</b> | 4.201        | 0.992        |
| NAF (Shared)     | <b>0.403</b> | <b>4.191</b> | <b>0.972</b> |

Table A1: **Comparison against a kernel regression baseline** We compare against a kernel ridge regression baseline on the MeshRIR dataset. We find that our NAFs perform better on the metrics evaluated.

15 In Table A1, we compare our method against "Kernel Ridge Regression with Constraint of Helmholtz  
16 Equation for Sound Field Interpolation" on the MeshRIR dataset. "Ridge-Orig" denotes the authors  
17 proposed setup which applies a 500Hz low pass filter. While "Ridge-Unfiltered" is a modified setup  
18 where we do not perform a low pass. Note that their method requires an individual model for each  
19 unique emitter location, while our NAFs can be queried using any emitter/receiver position.

| Method       | DRR error ↓  |              |              |              |              |              |              | Mean         |
|--------------|--------------|--------------|--------------|--------------|--------------|--------------|--------------|--------------|
|              | Large 1      | Large 2      | Medium 1     | Medium 2     | Small 1      | Small 2      | MeshRIR      |              |
| AAC-nearest  | 1.748        | 2.424        | 1.344        | 1.343        | 1.213        | 1.108        | 1.286        | 1.495        |
| AAC-linear   | 1.797        | 2.147        | 1.457        | 1.458        | 1.117        | 1.226        | 1.222        | 1.490        |
| Opus-nearest | 2.931        | 3.275        | 2.756        | 2.769        | 3.548        | 3.255        | 2.698        | 3.033        |
| Opus-linear  | 2.645        | 2.771        | 2.381        | 2.370        | 3.266        | 2.882        | 2.529        | 2.692        |
| DSP          | 3.559        | 4.421        | 4.727        | 4.805        | 5.622        | 6.723        | -            | 4.976        |
| NAF (Dual)   | 1.645        | 1.830        | 1.113        | <b>1.082</b> | <b>0.796</b> | <b>0.799</b> | 0.992        | 1.179        |
| NAF (Shared) | <b>1.468</b> | <b>1.793</b> | <b>1.083</b> | 1.089        | 0.829        | 0.837        | <b>0.972</b> | <b>1.153</b> |

Table A2: **Mean absolute error of DRR.** We compute the direct-to-reverberant ratio (DRR). Here we show the mean absolute error of the DRR. Units are dB, left/right channel is processed independently.

20 In Table A2 we evaluate the error in the direct-to-reverberant ratio for the impulse response in each  
21 method. The direct-to-reverberant measures the ratio of energy between the direct and reverberant  
22 component of an impulse response. We find that NAFs have lower DRR error than baseline methods.

| Method       | IACC error ↓ |              |              |              |              |              | Mean         |
|--------------|--------------|--------------|--------------|--------------|--------------|--------------|--------------|
|              | Large 1      | Large 2      | Medium 1     | Medium 2     | Small 1      | Small 2      |              |
| AAC-nearest  | 236.8        | 184.2        | 213.7        | 215.3        | 264.8        | 272.5        | 231.2        |
| AAC-linear   | 212.3        | 156.7        | 185.9        | 187.8        | 245.2        | 265.2        | 208.8        |
| Opus-nearest | 73.75        | 45.97        | 71.97        | 74.70        | 103.8        | <b>67.40</b> | 72.93        |
| Opus-linear  | 75.56        | 48.32        | 73.38        | 77.33        | 109.2        | 78.10        | 76.98        |
| DSP          | 460.5        | 446.0        | 430.0        | 430.1        | 443.6        | 446.3        | 442.7        |
| NAF (Dual)   | 74.01        | 45.94        | 71.89        | 74.70        | 103.8        | <b>67.40</b> | 72.96        |
| NAF (Shared) | <b>73.68</b> | <b>45.90</b> | <b>71.52</b> | <b>73.58</b> | <b>103.6</b> | <b>67.40</b> | <b>72.62</b> |

Table A3: **Mean absolute error of IACC.** We compute interaural cross correlation coefficient (IACC) using the impulse response from the left and right ears. Here we show the mean absolute error of the IACC for a given method and the ground truth. Units are seconds, for visualization values are multiplied by 1e6, lower is better.

23 In Table A3 we evaluate the error in the interaural cross correlation coefficient (IACC). The IACC is  
24 correlated with the ability for humans to localize a sound. We find that NAFs have low IACC error.

## D Architecture and Training Details

We visualize [all three models](#) that we experiment with.

In Figure A3 is a network that uses different local feature grids for the emitter and receiver (dual grids). The network uses the emitter and listener positions to sample from the two different grids.

In Figure A4 we show a model where the local feature grids for the emitter and receiver are shared. This network uses the emitter and listener positions to sample from the same shared grid.

In Figure A5 we show a model that does not utilize any kind of local geometry conditioning.

The listener, emitter, phase, and time input are transformed using sinusoidal embedding, while the orientation and left/right are retrieved. All transformed inputs are directly fed to the network. We find that the sharing the feature grid performs better than using different local feature grids.

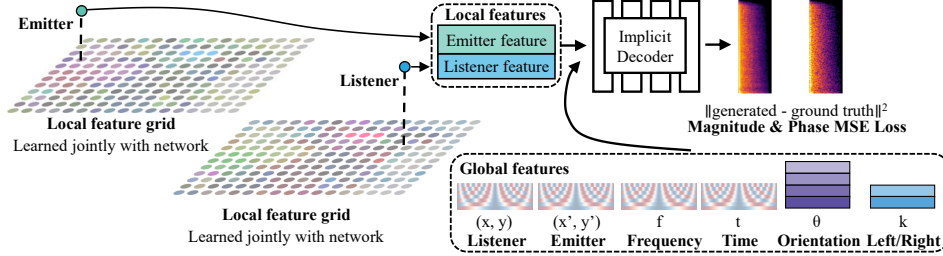

Figure A3: Architecture of the model that uses emitter and listener specific local geometry conditioning.

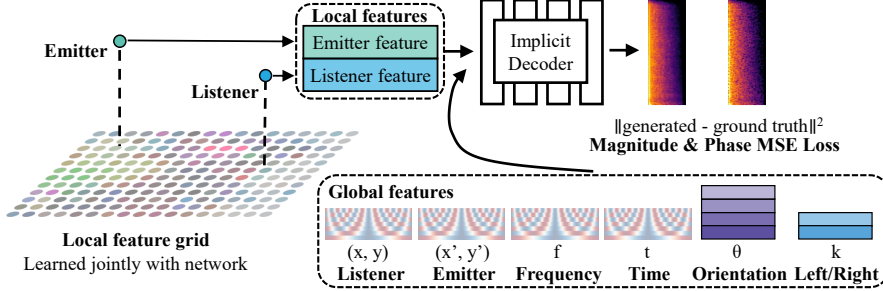

Figure A4: Architecture of the model that share emitter and listener local geometry conditioning.

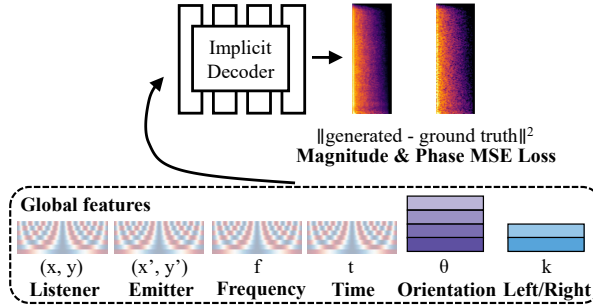

Figure A5: Architecture of the model that uses no local geometry conditioning.

Each network consists of 8 fully connected layers in a feedforward fashion, as well as a skip connection consisting of two fully connected layers. The skip connection takes the input and adds its output to that for the fourth intermediate layer. We utilize an intermediate feature size of 512, and Leaky ReLU with a slope of 0.1 as the activation function. The grid is initialized to stretch the bounding box of a scene. Each point is located at a distance of 0.25m from the nearest neighbor. 64 features are used for each point. Each element of the grid is initialized i.i.d. from  $\mathcal{N}(0, \frac{1}{\sqrt{64}})$ . We initialize the bandwidth for each point at  $\sigma = 0.25$ , and jointly train the bandwidth as part of the network. For the network and the grid, we utilize an initial learning rate of  $5e - 4$ . The

43 *Adam* optimizer is used when training our network. We utilize a orientation embedding of shape  
 44  $\mathcal{R}^{7 \times 4 \times 512}$  where 7 is the number of intermediate outputs, 4 is the number of orientations, and 512  
 45 is the feature dimension. For the left-right embedding, we use a shape of  $\mathcal{R}^{7 \times 2 \times 512}$ . We perform  
 46 additive conditioning by adding a  $\mathcal{R}^{512}$  vector to each intermediate output for both the orientation  
 47 and the left/right.

48 For each scene, to generate a log-spectrogram for each impulse response, we compute the mean and  
 49 standard deviation  $\mu_{(t,f)}, \sigma_{(t,f)}$  for each time/frequency index in the log-spectrogram, and normalize  
 50 the data prior to training:

$$v_{\text{STFT\_mag}}(t, f) = \frac{v_{\text{STFT\_mag}}(t, f) - \mu_{(t,f)}}{3.0 \times \sigma_{(t,f)}}$$

51 To generate the instantaneous frequency (phase) representation for each impulse response, we  
 52 normalize the data prior to training:

$$v_{\text{STFT\_IF}} = \frac{v_{\text{STFT\_IF}}}{3.0 \times \sigma_{\text{IF}}}$$

53 For the sinusoidal embedding, we utilize both cos and sin with 10 frequencies each for encoding  
 54 position, phase, and time. For encoding position we utilize a max frequency of  $2^7\text{Hz}$ , while for  
 55 encoding time and frequency we utilize a max frequency of  $2^{10}\text{Hz}$ .

56 Since we do not know beforehand the time duration of an impulse response at an unseen location,  
 57 we compute the maximum impulse length for each scene and use this length to zero pad the training  
 58 impulse responses. Because the padded regions do not contain useful information, we want the  
 59 network to focus modeling efforts on the early regions of the impulse response. We achieve this  
 60 by stochastically padding the impulse response to maximum impulse length with 0.1 probability.  
 61 Because the implicit function is trained on individual  $(t, f)$  coordinates within a given  $v_{\text{STFT}}$ , training  
 62 samples do not need to be of the same length. During test time, we perform inference up to the  
 63 maximum duration of scene impulse response.

## 64 E Dataset Visualization

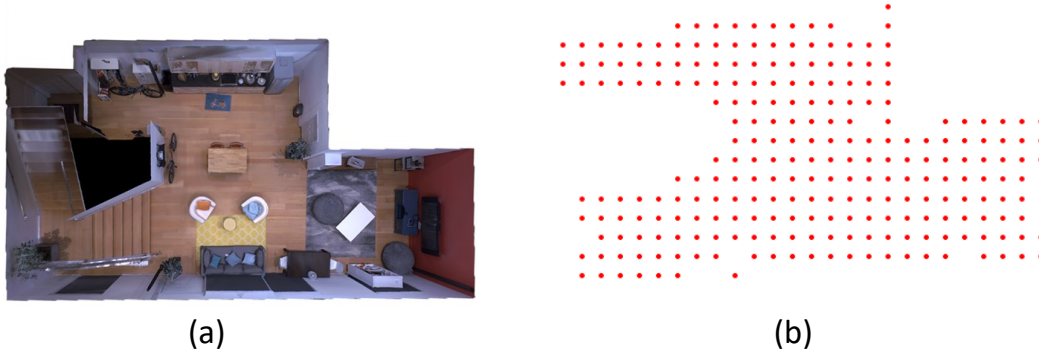

Figure A6: A room the emitter-listener probes. **(a)** The 3D structure of a room. **(b)** The probes marking the location of emitters/listeners.

65 In Figure A6, we visualize both the room and underlying set of probe positions in the training data.  
 66 Due to occlusion and the geometry, even slightly moving the emitter or listener position can result in  
 67 different results. As we demonstrated, both nearest neighbor and linear interpolation perform poorly  
 68 compared to our learned solution. In contrast, recovered acoustic fields from NAF trained on these  
 69 probe positions is substantially denser (Figure A1).

## 70 F Storage Comparison

71 We compare the averaged on disk storage cost of the different methods for inferring the spatial audio  
 72 using a precomputed training set in Table A4. Both linear and nearest interpolation methods require

| Method       | Storage (MiB) |         |          |          |         |         |        |
|--------------|---------------|---------|----------|----------|---------|---------|--------|
|              | Large 1       | Large 2 | Medium 1 | Medium 2 | Small 1 | Small 2 | Mean   |
| AAC          | 495.97        | 478.55  | 483.42   | 451.14   | 116.75  | 54.64   | 346.74 |
| Opus         | 258.51        | 257.08  | 245.65   | 231.06   | 66.15   | 29.75   | 181.37 |
| NAF (Dual)   | 8.78          | 8.87    | 8.87     | 8.92     | 8.45    | 8.37    | 8.71   |
| NAF (Shared) | 8.44          | 8.49    | 8.49     | 8.51     | 8.28    | 8.23    | 8.41   |

Table A4: **Storage cost of different methods.** We average the amount of data required for different methods of inference for the six scenes. Our NAFs are able to compactly represent the scene while maintaining higher quality.

access to the entire training set, while our NAF based approaches compactly encode the acoustic scene.

## G Details of the compression baselines

If uncompressed, the precomputed spatial acoustic field can reach gigabyte or terabyte sizes depending on probe density, scene size, and bandwidth of the impulse. When applied to gaming and virtual reality applications, minimizing the space taken up by these acoustic representations is critical and have been widely studied.

We utilize two state-of-the-art lossy coding methods applied to the audio. They are respectively Advanced Audio Coding (AAC-LC) and Xiph Opus. These two methods were chosen because they are in widespread usage for media encoding, are among the best coding methods for a given bitrate, and have high quality open-source implementations available. The bitrates were selected on the basis of attempting to match the size of the NAFs representations, while being allowed by the respective encoders.

We describe the parameters and additional details for these two coding methods.

### G.1 AAC baseline

We utilize `ffmpeg 5.0`, and select the open source "aac" implementation. We set the combined stereo bitrate to 24 kBit/s (12kBit/s per channel) in constant bit rate mode, as we found that there are occasional encode/decode failures below this bitrate.

### G.2 Opus baseline

We utilize `opustools 0.2` backed by `libopus 1.3.1`. The encoder is set to 12kBit/s for stereo (6kBit/s per channel) in constrained variable bitrate mode. Complexity it set to the maximum of 10, and music mode is set (as opposed to speech tuning mode).

## H Alternative Neural Representations

| Representation | Spectral loss ↓ | T60↓  |
|----------------|-----------------|-------|
| Time domain    | 2.046           | 49.72 |
| NAFs           | 0.396           | 4.166 |

Table A5: **Learning different representations** We compare NAFs in the STFT domain against directly learning in the time domain.

Our current method follows prior work in learning the log-magnitude STFT and instantaneous frequency phase. In this section, we investigate a possible alternative of directly learning in the time domain. The MSE and T60 error percentage is presented in Table A5. We observe that modeling in the time domain performs poorly.

|                     | Large 1         |                  | Large 2         |                  |
|---------------------|-----------------|------------------|-----------------|------------------|
|                     | PSNR $\uparrow$ | MSE $\downarrow$ | PSNR $\uparrow$ | MSE $\downarrow$ |
| NeRF + grid + $L_2$ | 22.69           | 6.956            | 24.86           | 7.128            |
| NeRF + grid         | <b>25.41</b>    | <b>6.618</b>     | <b>25.70</b>    | <b>6.921</b>     |

Table A6: **Regularizing the grid.** In this experiment, we compare learning NeRF with a grid without regularization, and with  $L_2$  regularization.

## 100 I $L_2$ regularized grid in NeRF

101 In Table A6 we compare NeRF that utilizes a grid and trained using image reconstruction loss, against  
102 a variant where a  $L_2$  penalty with weight  $1e-5$  to ensure a smooth latent space is added to the image  
103 reconstruction loss. There are 75 images used in the training set. We observe degraded performance  
104 when we apply this penalty. This indicates that our NAFs are providing more information than simple  
105 regularization to ensure a smooth latent grid.

## 106 J Societal Impact

107 Our work focuses on learning a high quality representation of acoustic fields. The primary use case for  
108 our work lies in virtual reality and gaming. As our work can lead to more believable and higher quality  
109 representations of spatial audio than alternative methods, it is possible that our work could increase  
110 the dependency and time spent on gaming. The more compact nature of our acoustic representations  
111 may allow for spatial audio to be deployed to more systems, and enable more equitable access.
